# Supplementary material for: Use of mental health services in the aftermath of COVID-19 waves: a retrospective study conducted in a French Psychiatric and Neurosciences University Hospital
Source: HighWire-hosted journal article supplement (doi:10.1136/bmjopen-2022-064305), 2023-02-01
Supplement: bmjopen-2022-064305supp002_data_supplement.pdf [file bmjopen-2022-064305supp002_data_supplement.pdf]

## Supplementary material 2: Frequencies and proportions of hospital admissions according to diagnosis by age groups and year, between 2019 and 2021

Table S2.1: Frequencies and proportions of hospital admissions of 15-24 years old according to diagnosis, between 2019 and 2021

|                                                                                       | 2019  |     | 2020  |     | Evolution<br>2019-<br>2020 | 2021  |     | Evolution<br>2019-<br>2021 |
|---------------------------------------------------------------------------------------|-------|-----|-------|-----|----------------------------|-------|-----|----------------------------|
|                                                                                       | Freq. | %   | Freq. | %   |                            | Freq. | %   |                            |
| Mental and behavioural disorders due to psychoactive substance use                    | 71    | 3%  | 70    | 4%  | -1%                        | 85    | 4%  | 20%                        |
| Schizophrenia, schizotypal and delusional disorders                                   | 624   | 26% | 546   | 27% | -13%                       | 490   | 20% | -21%                       |
| Mood [affective] disorders                                                            | 490   | 21% | 399   | 20% | -19%                       | 679   | 28% | 39%                        |
| Neurotic, stress-related and somatoform disorders                                     | 170   | 7%  | 147   | 7%  | -14%                       | 161   | 7%  | -5%                        |
| Behavioural syndromes associated with physiological disturbances and physical factors | 69    | 3%  | 48    | 2%  | -30%                       | 42    | 2%  | -39%                       |
| Disorders of adult personality and behaviour                                          | 178   | 8%  | 169   | 9%  | -5%                        | 194   | 8%  | 9%                         |
| Behavioural and emotional disorders (childhood and adolescence onset)                 | 145   | 6%  | 115   | 6%  | -21%                       | 133   | 6%  | -8%                        |
| Non-psychiatric disorders                                                             | 608   | 26% | 493   | 25% | -19%                       | 625   | 26% | 3%                         |
| Total patients                                                                        | 2355  |     | 1987  |     |                            | 2409  |     |                            |

Table S2.2: Frequencies and proportions of hospital admissions of 25-44 years old according to diagnosis, between 2019 and 2021

|                                                                                       | 2019  |     | 2020  |     | Evolution<br>2019-<br>2020 | 2021  |     | Evolution<br>2019-<br>2021 |
|---------------------------------------------------------------------------------------|-------|-----|-------|-----|----------------------------|-------|-----|----------------------------|
|                                                                                       | Freq. | %   | Freq. | %   |                            | Freq. | %   |                            |
| Mental and behavioural disorders due to psychoactive substance use                    | 315   | 6%  | 258   | 6%  | -18%                       | 319   | 7%  | 1%                         |
| Schizophrenia, schizotypal and delusional disorders                                   | 1903  | 35% | 1534  | 35% | -19%                       | 1562  | 35% | -18%                       |
| Mood [affective] disorders                                                            | 958   | 18% | 809   | 19% | -16%                       | 1005  | 22% | 5%                         |
| Neurotic, stress-related and somatoform disorders                                     | 210   | 4%  | 150   | 3%  | -29%                       | 163   | 4%  | -22%                       |
| Behavioural syndromes associated with physiological disturbances and physical factors | 78    | 1%  | 44    | 1%  | -44%                       | 47    | 1%  | -40%                       |
| Disorders of adult personality and behaviour                                          | 228   | 4%  | 194   | 4%  | -15%                       | 158   | 4%  | -31%                       |
| Behavioural and emotional disorders (childhood and adolescence onset)                 | 52    | 1%  | 78    | 2%  | 50%                        | 55    | 1%  | 6%                         |
| Non-psychiatric disorders                                                             | 1660  | 31% | 1278  | 29% | -23%                       | 1171  | 26% | -29%                       |
| Total patients                                                                        | 5404  |     | 4345  |     |                            | 4480  |     |                            |

Table S2.3: Frequencies and proportions of hospital admissions of 45-64 years old according to diagnosis, between 2019 and 2021

|                                                                                       | 2019  |     | 2020  |     | Evolution<br>2019-<br>2020 | 2021  |     | Evolution<br>2019-<br>2021 |
|---------------------------------------------------------------------------------------|-------|-----|-------|-----|----------------------------|-------|-----|----------------------------|
|                                                                                       | Freq. | %   | Freq. | %   |                            | Freq. | %   |                            |
| Mental and behavioural disorders due to psychoactive substance use                    | 230   | 6%  | 210   | 6%  | -9%                        | 185   | 5%  | -20%                       |
| Schizophrenia, schizotypal and delusional disorders                                   | 1408  | 35% | 1124  | 33% | -20%                       | 1067  | 30% | -24%                       |
| Mood [affective] disorders                                                            | 898   | 22% | 845   | 25% | -6%                        | 1145  | 32% | 28%                        |
| Neurotic, stress-related and somatoform disorders                                     | 105   | 3%  | 92    | 3%  | -12%                       | 91    | 3%  | -13%                       |
| Behavioural syndromes associated with physiological disturbances and physical factors | 13    | 0%  | 14    | 0%  | 8%                         | 7     | 0%  | -46%                       |
| Disorders of adult personality and behaviour                                          | 73    | 2%  | 83    | 2%  | 14%                        | 65    | 2%  | -11%                       |
| Behavioural and emotional disorders (childhood and adolescence onset)                 | 19    | 0%  | 12    | 0%  | -37%                       | 11    | 0%  | -42%                       |
| Non-psychiatric disorders                                                             | 1322  | 32% | 993   | 29% | -25%                       | 982   | 28% | -26%                       |
| Total patients                                                                        | 4068  |     | 3373  |     |                            | 3553  |     |                            |

Table S2.4: Frequencies and proportions of hospital admissions of 65 years old and over according to diagnosis, between 2019 and 2021

|                                                                                       | 2019  |     | 2020  |     | Evolution<br>2019-<br>2020 | 2021  |     | Evolution<br>2019-<br>2020 |
|---------------------------------------------------------------------------------------|-------|-----|-------|-----|----------------------------|-------|-----|----------------------------|
|                                                                                       | Freq. | %   | Freq. | %   |                            | Freq. | %   |                            |
| Mental and behavioural disorders due to psychoactive substance use                    | 38    | 2%  | 24    | 2%  | -37%                       | 22    | 2%  | -42%                       |
| Schizophrenia, schizotypal and delusional disorders                                   | 344   | 22% | 287   | 22% | -17%                       | 299   | 23% | -13%                       |
| Mood [affective] disorders                                                            | 703   | 44% | 664   | 50% | -6%                        | 553   | 43% | -21%                       |
| Neurotic, stress-related and somatoform disorders                                     | 36    | 2%  | 31    | 2%  | -14%                       | 45    | 3%  | 25%                        |
| Behavioural syndromes associated with physiological disturbances and physical factors | 3     | 0%  | 3     | 0%  | 0%                         | 1     | 0%  | -67%                       |
| Disorders of adult personality and behaviour                                          | 15    | 1%  | 12    | 1%  | -20%                       | 15    | 1%  | 0%                         |
| Behavioural and emotional disorders (childhood and adolescence onset)                 | 6     | 0%  | 4     | 0%  | -33%                       | 2     | 0%  | -67%                       |
| Non-psychiatric disorders                                                             | 447   | 28% | 296   | 22% | -34%                       | 359   | 28% | -20%                       |
| Total patients                                                                        | 1592  |     | 1321  |     |                            | 1296  |     |                            |
